1 **The predictive potential of key adaptation parameters and proxy fitness traits**  
2 **between benign and stressful thermal environments**

3

4 Jennifer M. Cocciardi<sup>1\*</sup>, Eleanor K. O'Brien<sup>2,4</sup>, Conrad J. Hoskin<sup>1</sup>, Henry Stoetzel<sup>3</sup>, Megan  
5 Higgle<sup>1</sup>

6

7 <sup>1</sup>College of Science and Engineering, James Cook University, Douglas, QLD 4811,

8 Australia, <sup>2</sup>School of Biological Sciences, University of Bristol, Bristol BS8 1TL, UK,

9 <sup>3</sup>School of Earth and Environmental Sciences, University of Queensland, St Lucia, QLD,

10 4072, Australia, <sup>4</sup>Current address: Centre for Precision Health, School of Medical & Health

11 Sciences, Edith Cowan University, Joondalup, WA 6027, Australia.

12

13 \*Corresponding author details: Jennifer M. Cocciardi, College of Science and Engineering,

14 James Cook University, Douglas, QLD 4811, [jenny.cocciardi@my.jcu.edu.au](mailto:jenny.cocciardi@my.jcu.edu.au)

15

16 **Running headline:** Genetic variances and covariances across environments

17

18 **Word count:** 6998

19 **Abstract**

20

21 Understanding the adaptive potential of a species is key when predicting whether a species  
22 can contend with climate change. Adaptive capacity depends on the amount of genetic  
23 variation within a population for relevant traits. However, genetic variation changes in  
24 different environments, making it difficult to predict whether a trait will respond to selection  
25 when not measured directly in that environment. Here, we investigated how genetic  
26 variances, and phenotypic and genetic covariances, between a fitness trait and morphological  
27 traits changed between thermal environments in two closely-related *Drosophila*. If  
28 morphological traits strongly correlate with fitness, they may provide an easy-to-measure  
29 proxy of fitness to aid in understanding adaptation potential. We used a parent-offspring  
30 quantitative genetic design to test the effect of a benign (23°C) and stressful (28°C) thermal  
31 environment on genetic variances of fecundity and wing size and shape, and their phenotypic  
32 and genetic covariances. We found genetic variances were higher within the stressful  
33 environment for fecundity but lower within the stressful environment for wing size. We did  
34 not find evidence for significant phenotypic correlations. Phenotypic and genetic correlations  
35 did not reveal a consistent pattern between thermal environments *or* within or between  
36 species. This corroborates previous research and reiterates that conclusions drawn in one  
37 environment about the adaptive potential of a trait, and the relationship of that trait with  
38 fitness, cannot be extrapolated to other environments *or* within or between closely-related  
39 species. This confirms that researchers should use caution when generalising findings across  
40 environments in terms of genetic variation and adaptive potential.

## 41 **Introduction**

42

43 Climate change is causing increased temperatures that will impose stress on species (Thomas  
44 et al. 2004). Many species lack the ability to disperse to more optimal environments (Bellard  
45 et al. 2012; Ceballos et al. 2017), and will have to adapt to the stressful temperatures to  
46 survive in the long-term (Thomas et al. 2004; Hoffmann and Sgrò 2011). Adaptation  
47 potential will depend on the amount of genetic variation in traits relevant to the selection  
48 imposed by environmental change (Fisher 1930; Falconer and Mackay 1996), and adaptation  
49 will need to be rapid given the speed of human-induced climate change. Understanding the  
50 adaptive potential of species, especially those currently living close to their upper thermal  
51 limits, is therefore crucial in today's changing climate (Urban et al. 2016; Funk et al. 2019;  
52 Shaw 2019).

53       Importantly, genetic variation is context-dependent — meaning the amount of genetic  
54 variation in a trait in a given population can change under different environments (Falconer  
55 and Mackay 1996; Hoffmann and Schiffer 1998; Sgrò and Hoffmann 1998a, c; Hoffmann  
56 and Merilä 1999). Short-term environmental changes can play an important role in adaptive  
57 evolution (Wood and Brodie 2016) and can induce a similar or larger change in genetic  
58 variance than changes to the genetic architecture that accumulate over hundreds of  
59 generations between populations (for review, see Wood and Brodie 2015). Increases in  
60 environmental variability, such as those predicted with climate change, will therefore directly  
61 affect the rate of evolution of a trait — as environments get warmer, not only may the type of  
62 selective pressure change, but also the potential for the trait to respond to selection. This is  
63 important because as researchers aim to determine whether species can adapt to climate  
64 change, the changing climate itself may increase or decrease adaptation potential.

65           Much research has focused on examining whether there is a consistent pattern to  
66 changes in expression of genetic variance (for reviews, see Sgrò and Hoffmann 2004;  
67 Rowiński and Rogell 2017; Fischer et al. 2020). However, there is no consensus on whether  
68 stressful conditions increase or decrease the expression of genetic variance. The majority of  
69 studies focus on quantifying genetic variance by calculating heritability ( $h^2$ ), which describes  
70 the relative amount of genetic variance due to additive effects standardised by total  
71 phenotypic variance. Heritability can then be used to predict the magnitude of the response to  
72 selection via the breeder's equation. These studies show both increases (e.g., Sgrò and  
73 Hoffmann 1998a, c; Swindell and Bouzat 2006) and decreases (e.g., Hoffmann and Schiffer  
74 1998; Bublly et al. 2001; Kristensen et al. 2015) in heritability under stressful conditions.  
75 Increased heritability may result from novel genetic variance that is expressed when exposed  
76 to new conditions (i.e., 'cryptic genetic variance'; see review by Hoffmann and Schiffer  
77 1998; but also see Swindell and Bouzat 2006). Decreased heritability may result from low  
78 cross-environment genetic covariances (Fischer et al. 2020), or environmental variance  
79 increasing while other variance components remain the same (for example see Hoffmann and  
80 Schiffer 1998). Recently, studies have recommended quantifying genetic variance using  
81 parameters standardized by the trait mean — such as coefficient of additive variance ( $CV_A$ )  
82 and its square, evolvability ( $I_A$ ) — because estimates of heritability, which are standardised  
83 by the phenotypic variance, can be influenced by sources of non-genetic environmental  
84 variation that may preclude comparison across environments and traits (Houle 1992).

85           Assessing the effect of a changing environment on genetic variance is further  
86 complicated when attempting to measure genetic variance across different environments for  
87 fitness. Direct fitness (reproductive success) is often difficult to measure in the wild because  
88 of uncontrolled and unmeasured factors (Orr 2009), and in the laboratory due to time and  
89 logistical constraints (Rosenberg 1982; Nguyen and Moehring 2015). Instead, a

90 morphological trait that strongly correlates with fitness, and is more easily measured, may  
91 provide a good proxy when fitness measures are difficult to obtain. If phenotypic correlations  
92 between a morphological trait and fitness are strong, researchers can use the easier-to-  
93 measure trait to predict genetic variation of fitness across different environments (Arnold  
94 1983).

95 More importantly, a strong phenotypic correlation may indicate that two traits are  
96 genetically linked through physical linkage, pleiotropy, or linkage disequilibrium (Cheverud  
97 1988; Conner and Via 1992; Roff 1995; Blows and Hoffmann 2005). This means a positive  
98 genetic correlation between traits could aid adaptation to novel environments if selection  
99 favours that trait combination through augmenting the effect of selection on the correlated  
100 fitness trait (Blows and Hoffmann 2005; Agrawal and Stinchcombe 2009; Walsh and Blows  
101 2009; Holman and Jacomb 2017). Therefore, determining genetic correlations of traits with  
102 fitness is an important part of the puzzle when predicting evolutionary potential.

103 However, much like genetic variation in individual traits, phenotypic and genetic  
104 covariances between traits (or between a trait and fitness) can vary depending upon the  
105 environment in which they are measured (Sgrò and Hoffmann 2004) — meaning  
106 measurements obtained in one environment cannot necessarily be generalized to other  
107 environments. For example, in a beetle, adult female body mass and her egg size were  
108 positively correlated on one host-plant species and negatively correlated on a different host-  
109 plant species (Czesak and Fox 2003). Changes to genetic correlations can result within novel  
110 environments due to genotype-environment interactions — where genes that affect a trait in  
111 one environment may not be influential in a different environment (Sgrò and Hoffmann  
112 2004). In some instances, the loci that contribute to covariances through pleiotropy or  
113 physical linkage have specifically been found to be influenced by environmental effects (e.g.,  
114 Hausmann et al. 2005; Gutteling et al. 2007). However, more empirical data are needed to

115 understand whether there are patterns to how genetic variances and covariances of  
116 morphological and fitness traits vary across thermal environments (Rowiński and Rogell  
117 2017; Fischer et al. 2020).

118 *Drosophila* are often used to investigate genetic variances due to their short  
119 generation time and ability to produce large numbers of offspring that allow for quantitative  
120 genetic experimental designs. Fecundity is a commonly assessed fitness trait in *Drosophila*.  
121 However, measuring fecundity can often prove time- and labour-intensive and logistically  
122 challenging. Ecological theory assumes that body size is correlated with fecundity, with  
123 larger individuals exhibiting a higher fecundity (Chiang and Hodson 1950; Santos et al. 1992;  
124 Robertson 1956), and wing length has been shown to phenotypically correlate with fecundity  
125 (Tantawy and Vetukhiv 1960; Woods et al. 2002). However, two key studies examining the  
126 relationship of wing length and fecundity in *Drosophila* when exposed to stressful  
127 environments found mixed evidence. Sgró and Hoffmann (1998a) did not detect a significant  
128 positive phenotypic or genetic correlation in a cold-stress, heat-stress, or benign environment.  
129 They also did not find a significant genetic cross-environment correlation (parents raised in  
130 one environment and offspring raised in a different environment) between cold-stress, heat-  
131 stress, or benign environments (Sgró and Hoffmann 1998a) — meaning that they did not find  
132 a correlation between wing length and fecundity among and between any experimental  
133 environment. Conversely, Woods et al. (2002) found significant positive phenotypic  
134 correlations (for two of three generations) and significant positive genetic correlations  
135 between wing length and fecundity in a stressful environment, but not in a benign  
136 environment.

137 With advances in technology over the past decade (i.e., advances in microscopic  
138 imaging and digitizing), more intricate morphological traits such as wing size and wing shape  
139 have been increasingly used in place of wing length. However, very few studies have

140 examined genetic variation and heritability in wing size and shape (Gilchrist and Partridge  
141 1999; Hoffmann and Shirriffs 2002; Moraes et al. 2004); and, to our knowledge, only one has  
142 examined the phenotypic and genetic correlations of wing size with fecundity (e.g., Woods et  
143 al. 2002). Wing size and wing shape in *Drosophila* have a polygenic basis independent of  
144 one another (Carreira et al. 2011), so phenotypic and genetic correlations of each of these  
145 traits with fecundity may differ. Wing size exhibits a history of directional selection in  
146 *Drosophila*, whereas wing shape has been shown to undergo optimizing selection (Gilchrist  
147 and Partridge 2001). Although most of the fundamental research uses wing length as a trait  
148 that is highly correlated to thorax size (and therefore body size; Chiang and Hodson 1950;  
149 Tantawy and Vetukhiv 1960; Santos et al. 1992; Woods et al. 2002), wing size may be a  
150 better indicator of overall body size because it is a product of more complex interactions  
151 between the different wing compartments (i.e., anterior and posterior compartments; Guerra  
152 et al. 1997; Gilchrist and Partridge 1999). Hence, wing size may account for a greater  
153 proportion of variation than wing length alone. Wing shape is important for flight  
154 performance in *Drosophila* and has been shown to exhibit high heritability (Hoffmann and  
155 Shirriffs 2002; Moraes et al. 2004). However, whether selection occurs on wing shape itself,  
156 or whether wing shape is correlated with another trait under selection is unknown (Gilchrist  
157 and Partridge 2001).

158       Temperature as a stressor is contextually important in today's climate, but it has only  
159 been used in one *Drosophila* study to assess whether genetic correlations exist between  
160 fecundity and wing length, and whether heritability changes between different thermal  
161 regimes (i.e., *D. melanogaster*; Sgrò and Hoffmann 1998a with the same data used in  
162 Woods et al. 2002). Here, we focused on whether genetic variances in fecundity change  
163 across thermal environments, and whether a morphological trait that may be a good proxy of  
164 fitness in one environment was also a good proxy in a stressful thermal-environment. We

165 examined the consistency of heritability, coefficient of additive genetic variance, and  
166 evolvability between thermal environments (one benign and one stressful), generations, and  
167 within and between two sibling species of *Drosophila*. A strength of this study is that we  
168 assessed both life history and morphology traits in two closely-related species to see  
169 whether this pattern was conserved. We also assessed the phenotypic and genetic  
170 covariances of these traits. The correlation of body morphology with fitness informs us  
171 about the strength and direction of selection. This is important because patterns of selection  
172 in one environment may not reflect similar responses in another environment.

173

## 174 **Methods**

175

### 176 *Experimental populations*

177

178 Two sibling species of fruit fly found along the east coast of Australia were used in this  
179 study: *Drosophila serrata*, a generalist species found in forested areas; and *D. birchii*, a  
180 specialist species confined to tropical rainforest ecosystems (Schiffer and Mcevey 2006;  
181 Higgin and Blows 2008). Mass bred populations from two different geographical areas for  
182 each species were used. Each mass bred population was originally created by breeding the  
183 offspring of ten isofemale lines collected from field sites within Queensland, Australia.  
184 *Drosophila birchii* flies were collected from Paluma National Park (19° 0'16.27"S,  
185 146°12'35.59"E) and Mt. Lewis National Park (16°35'30.36"S, 145°16'27.78"E). *Drosophila*  
186 *serrata* flies were collected from Paluma National Park (19° 0'16.27"S, 146°12'35.59"E) and  
187 Raglan Creek (23°42'49.74"S, 150°49'0.10"E). All flies were collected between February and  
188 May 2016. Isofemale lines were maintained in controlled laboratory conditions for 18  
189 generations before mass bred populations were created. All stocks were maintained at large



190 population sizes ( $N > 1000$ ) to retain natural genetic variation. Flies were reared on standard  
191 *Drosophila* food that contained sugar, yeast, and agar as described in Higgin and Blows  
192 (2008). All flies were reared under constantly controlled laboratory conditions of  $23^{\circ}\text{C} \pm$   
193  $1^{\circ}\text{C}$ , 50% relative humidity (RH), and 12 h light:dark cycles.

194

### 195 *Quantitative genetic experimental design*

196

197 A parent-offspring breeding design was used to assess heritability and phenotypic and genetic  
198 covariances of fecundity and wing morphology at a benign ( $23^{\circ}\text{C}$ ) and a stressful ( $28^{\circ}\text{C}$ )  
199 temperature (Fig. 1). The benign temperature ( $23^{\circ}\text{C}$ ) represents an approximate average  
200 temperature each species experiences across their range both temporally and spatially, as well  
201 as the optimal rearing temperature in the laboratory. A temperature of  $28^{\circ}\text{C}$  was chosen as a  
202 stressful thermal environment as it was found to be within the upper margin of the thermal  
203 niche for *D. birchii* and to place stress upon *D. serrata* (from pilot studies showing reduced  
204 survival). As such, full development was expected in both species at this temperature.

205 Two generations before the start of the experiment, density-controlled mass bred  
206 populations were created for each species and population by sexing 25 virgin females and 25  
207 virgin males from the laboratory stock and placing them in one 300 mL bottle with 100 mL  
208 of food. This was repeated three times for each species and population. Flies were removed  
209 from each replicate bottle after 72 h and bottles were carded for pupation. Offspring were  
210 collected at random and sexed to subsequently create family lines and stock mass bred  
211 populations for each species and treatment.

212 One generation before the start of the experiment (i.e., P generation; Fig. 1), virgin  
213 offspring were sexed from the density-controlled mass bred populations using  $\text{CO}_2$   
214 anesthetization. Flies were placed in 100 mL holding vials with 5 mL of food for 72 h to

215 allow for sexual maturation and full recovery from anesthetization, with 5 individuals per  
216 holding vial. After this, one male and one female were randomly collected and placed in a  
217 100 mL glass vial with 10 mL of food, stoppered with a porous stopper, and directly placed  
218 in an incubator set to the relevant temperature for each thermal environment treatment.  
219 Humidity inside the vials with the stoppers on remained at approximately 90% RH, and a  
220 12 h light:dark cycle was maintained. This was carried out for 50 family replicates for each  
221 species, population, and treatment. Mating pairs were allowed to mate for 48 hours before  
222 being removed from the vial. This ensured all experimental flies were reared in a controlled  
223 and low-density environment. In addition, three low-density stock bottles containing 10  
224 females and 10 males were created and maintained for both the parent and offspring  
225 generations to provide a supply of males for mating to assess fecundity (i.e., male mass  
226 bred; Fig. 1). Three stock mass bred bottles were maintained in each thermal environment  
227 and males were randomly collected from each bottle and mated with a female from the same  
228 experimental rearing temperature.

229

### 230 *Fecundity measurements*

231

232 Virgin female offspring of each family replicate vial were sexed under light anesthetization  
233 and placed in holding vials for 72 h. One female (i.e., dam) from each F<sub>1</sub> family was  
234 randomly selected and placed in an empty vial with one virgin male collected from the male  
235 stock bottles. Each vial contained a small spoon with 2 mL of food to provide a medium for  
236 oviposition. The food was dyed green to aid in counting eggs, and a drop of a live yeast-  
237 water solution (1 g baker's yeast:10 mL water) was spread over it to promote ovipositing.  
238 Vials were immediately placed within their temperature treatment and flies were allowed to  
239 mate for 24 h. After 24 h, the spoon was removed and immediately frozen at -19°C for eggs

240 to be counted at a later time, and replaced with a new spoon. This was repeated every 24 h  
241 for three days and a cumulative fecundity count was obtained. Cumulative fecundity  
242 measurements from the first three days of maturity are significantly correlated with lifetime  
243 reproductive success of female *Drosophila* (Pekkala et al. 2011; Nguyen and Moehring  
244 2015). After 72 h, the mating pair was transferred to a rearing vial with 10 mL of food and  
245 allowed to mate for the next 48 h period before being removed. Females were then  
246 immediately frozen for wing morphology measurements. Daughters of these pairs were  
247 collected from each vial and one virgin female offspring from each mating pair was assessed  
248 for fecundity and wing traits using the same methods described above.

249 Fecundity was scored using a microscope and click counter by counting the number  
250 of eggs on each spoon. Approximately one quarter of spoons were counted twice, at random,  
251 to assess repeatability; a positive correlation close to 1 indicated that counting was highly  
252 repeatable between measurements ( $r = 0.994$ ;  $P < 0.001$ ;  $N = 81$ ).

253

#### 254 *Wing morphometrics*

255

256 All dams and daughters were frozen at nine days old to assess wing size and shape. Left  
257 wings were removed using fine forceps and mounted on microscope slides with double-sided  
258 tape. Wings were photographed using a Leica Image microscope and Leica Application Suite  
259 software (LAS v. 3.8). Images were randomized and collated as a TPS file using *tpsUtil*  
260 (Rohlf 2010a). Landmarks were placed on ten consistent morphometric wing features of each  
261 image (Supplementary Fig. 1) using the program *tpsDig2* (Rohlf 2016). Outliers and  
262 landmarking errors were identified using *tpsRelW* (Rohlf 2010b) and corrected or removed  
263 before wing measurements were computed.

264 Landmarked coordinates underwent a Generalized Procrustes Analysis (GPA)  
265 superimposition (Rohlf and Slice 1990), where wing size and alignment are adjusted for by  
266 superimposing images upon one another over an average configuration. The GPA  
267 superimposition has been found to produce estimates with the least amount of error in a study  
268 on geomorphometrics (Rohlf 2003). The square root of the summed squared distance  
269 between centroid configuration and landmarks is known as the centroid size and provides a  
270 measure of overall size (Rohlf and Slice 1990; Rohlf 2000). Although size effects should be  
271 removed via the GPA, a correlation between shape and size might still occur (known as  
272 allometry), and hence this was also assessed.

273 In addition to centroid size, the GPA computes a set of Procrustes residuals for each  
274 landmark. A principle component analysis (PCA) was conducted upon these to identify  
275 variation components, which can be used to describe a single axis of variation in wing shape  
276 among individuals (Adams et al. 2004; Zelditch et al. 2004; Gómez et al. 2009). In this  
277 instance, the PCA is equivalent to a relative warp analysis because the variation between  
278 landmarks was not weighted by bending energy (Zelditch et al. 2004), so PCA scores are  
279 equivalent to relative warp (RW) scores. As per common practice, RW scores that explained  
280 greater than 5% of variation were used as shape variables (Zelditch et al. 2004; Gómez et al.  
281 2009) to analyse differences in wing shape using the *geomorph* package (Adams et al. 2020)  
282 in R.

283

284 *Analysis*

285

286 Data was checked for outliers, homogeneity, normality, and independence as outlined in the  
287 protocol described in Zuur et al. (2010) and analyses were performed using the statistical  
288 program R (R Core Team 2019). Mean trait values and phenotypic variances (calculated as

289 squared standard errors of the mean trait values) were calculated for fecundity, wing size, and  
290 wing shape for both the dam and daughter generations. To test whether thermal environment  
291 had an effect on mean trait values and on phenotypic variances, a two-way ANOVA (for  
292 thermal environment and generation and its interaction) or a generalized least square model  
293 was conducted for each trait and metric, depending on data structure. Population and its  
294 interaction with thermal environment was also included when significant. For the  
295 multivariate measure of shape (RW score matrix), a permutational MANOVA (also known as  
296 a Procrustes ANOVA; Goodall 1991) was used to test for differences in wing shape between  
297 thermal treatments, populations, and generations. All analyses were conducted separately for  
298 each species.

299       Narrow sense heritability ( $h^2$ ) for each trait was calculated from a regression of  
300 offspring trait values on maternal trait values (Falconer and Mackay 1996). As we conducted  
301 only a single-parent regression, the phenotypic resemblance is equal to half of the genetic  
302 variation and thus the slope parameter estimate  $\beta$  represents:

$$303 \quad \beta = 1/2 \left( \frac{V_A}{V_P} \right)$$

$$304 \quad \beta = 1/2 h^2$$

305 and so, heritability is equal to twice the slope of the regression line (Falconer and Mackay  
306 1996). In parent-offspring regression, estimates can be greatly skewed if variances found in  
307 the parental generation and offspring generation differ (Falconer and Mackay 1996). To  
308 overcome this, we standardized all traits to a mean of zero and standard deviation of one  
309 prior to computation of heritability and genetic covariances (Sgrò and Hoffmann 1998b). The  
310 significance of deviations of heritability estimates from zero were assessed using an  $F$ -test  
311 and all  $P$ -values were adjusted for using the False Discovery Rate method (Benjamini and  
312 Hochberg 1995). Standard errors of heritability were obtained directly from the regression  
313 model.

314 To obtain an overall estimate of heritability for wing shape, we followed the  
315 equations set forth in Monterio et al. (2002) for estimating heritability from a parent-  
316 offspring regression on a multivariate trait (i.e., wing shape with all RW scores included).  
317 This was done by first obtaining the coefficient of determination ( $R^2$ ) from a multivariate  
318 linear regression of offspring RW scores onto dam RW scores. The square root of the  
319 coefficient of determination ( $R$ ) was then used in the following formula:

$$320 \quad \beta = R \frac{S_O}{S_P}$$

321 where  $\beta$  is the multivariate regression coefficient,  $S_O$  is the standard deviation of the  
322 offspring trait, and  $S_P$  is the standard deviation of the parental trait. The multivariate  
323 regression coefficient multiplied by two is then equal to the heritability of the trait (to  
324 account for only having half of the genetic variation due to the single-parent-offspring  
325 comparison). Significance of deviation from zero for multivariate shape heritability was  
326 assessed using a Wilks' lambda test (Zelditch et al. 2004; Gómez et al. 2009).

327 In addition, coefficients of genetic variation ( $CV_A$ ) and evolvabilities ( $I_A$ ) were  
328 calculated following Houle (1992) as:

$$329 \quad CV_A = \frac{\sqrt{V_A}}{\bar{X}}$$

$$330 \quad I_A = \frac{V_A}{\bar{X}^2}$$

331 Because we did not directly calculate  $V_A$  in this analysis, we obtained estimates based on the  
332 method of Garcia-Gonzalez et al. (2012).  $V_A$  estimates were calculated by multiplying the  
333 total phenotypic variance ( $V_P$ ) of each trait mean by the narrow-sense heritability ( $h^2$ ), since  
334  $V_A = h^2 \times V_P$  (Falconer and Mackay 1996). This is an alternative way to calculate  $CV_A$   
335 when researchers do not have the sire variance component ( $V_{sire}$ ) or another direct measure of  
336  $V_A$  (Garcia-Gonzalez et al. 2012). Standardized data cannot be used to calculate  $CV_A$  and  $I_A$

337 because a scaling correction to a zero mean produces a meaningless comparison and  
338 undefined value when dividing by the trait mean a second time (Garcia-Gonzalez et al. 2012).  
339 The above methods were therefore only performed on non-standardized data and  $CV_A$  and  $I_A$   
340 values were not calculated for RW scores of wing shape as these are standardized.

341 The phenotypic correlation among each pair of traits was calculated as the Pearson  
342 correlation coefficient. Genetic covariances ( $cov_{XY}$ ) were obtained by regressing one trait in  
343 the parental generation onto the other trait in the offspring generation, in both directions  
344 (Supplementary Table 5), adjusting for relationship, and taking the mean of the adjusted  
345 Pearson correlation coefficients as suggested by Falconer and Mackay (1996). Genetic  
346 correlations were then calculated using the genetic covariances and the following equation:

347 
$$r_G = \frac{cov_{XY}}{\sqrt{cov_{XX}cov_{YY}}}$$

348 where  $cov_{XY}$  is the genetic ‘cross-covariance’ and  $cov_{XX}$  and  $cov_{YY}$  are the parent-offspring  
349 covariances for the individual traits. Standard errors for genetic correlations were calculated  
350 using an approximate formula as proposed by Reeve (1955), Robertson (1959) and explained  
351 in Falconer and Mackay (1996):

352 
$$\sigma_{r_G} = \frac{1 - r_G^2}{\sqrt{2}} \sqrt{\left[ \frac{\sigma(h_X^2) \sigma(h_Y^2)}{h_X^2 h_Y^2} \right]}$$

353  
354 All correlations were estimated using linear regression models that initially included the main  
355 effects of temperature and population and an interaction between them, with interaction and  
356 population terms removed if they were non-significant. In the majority of cases, population  
357 was not significant and this allowed for one correlation value per species.

358

359 **Results**

360

361 Mean trait values differed significantly between thermal environments for each species and  
362 generation ( $p = < 0.001$ ). Rearing in a stressful thermal environment resulted in lower  
363 fecundity (Supplementary Table 1 and Supplementary Fig. 2), smaller wing size  
364 (Supplementary Table 2 and Supplementary Fig. 3), and a rounder, less elongated wing shape  
365 when adjusted for size (Supplementary Table 3 and Supplementary Fig. 4) across all species,  
366 populations, and generations.

367

368 *How does genetic variation change in a stressful thermal environment?*

369

370 Fecundity

371

372 Phenotypic variation in fecundity did not differ significantly between thermal environments,  
373 but was slightly higher within the stressful environment than the benign environment (Table  
374 1).  $CV_A$  estimates could not be calculated for *D. birchii* within the stressful temperature  
375 because unexpectedly the offspring did not emerge in this treatment.  $CV_A$  and evolvability  
376 ( $I_A$ ) estimates for fecundity were higher than for morphological traits in all instances, and  
377 slightly higher in the stressful environment than in the benign environment in *D. serrata*  
378 (Table 1 and Fig. 2). Fecundity was found to have a low heritability overall that was slightly  
379 higher under the benign than stressful thermal environment in *D. serrata* (Table 1 and Fig. 2).

380



381 Morphological wing traits

382

383 Phenotypic variation in wing size differed significantly between thermal environments for  
384 dams of both species (*D. serrata*:  $P = 0.02$ ; *D. birchii*:  $P = 0.005$ ), and was slightly higher  
385 within the benign environment (Supplementary Table 2). Heritability, evolvability, and  $CV_A$   
386 estimates were higher within the benign environment than the stressful environment in *D.*  
387 *serrata*, and heritability values were overall much higher for wing size compared to fecundity  
388 (Table 1 and Fig. 2).

389 Phenotypic variation in wing shape variables significantly differed between thermal  
390 environments for all RW scores in *D. serrata* ( $P < 0.005$ ), but did not differ between thermal  
391 environments in *D. birchii*. The direction and magnitude of changes in phenotypic variances  
392 did not show a consistent pattern across thermal environments (Supplementary Table 3).

393 Wing shape heritability increased within the stressful environment in *D. serrata* (Table 1 and  
394 Fig. 2). Heritability in all instances was much higher than for fecundity. In addition, wing  
395 size and wing shape evolvabilities and  $CV_A$  estimates were all very low compared to  
396 fecundity (Fig. 2).

397

398 *How does phenotypic correlation of traits change in a stressful environment?*

399

400 There were no significant phenotypic correlations found between fecundity and wing size  
401 after correction for multiple comparisons (Table 2 and Fig. 3).

402 Fecundity and wing shape traits exhibited mixed and inconsistent results (Fig. 3 and  
403 Supplementary Table 4). There was only one significant phenotypic correlation found  
404 between fecundity and a wing shape variable within the daughter generation of the Mt. Lewis  
405 population of *D. serrata* under a stressful thermal environment. Allometry was found within

406 the benign environment for the daughter generation of *D. serrata*, indicating wing size and  
407 wing shape in this instance are still slightly correlated even after removing effects of size  
408 during the GPA analysis (Supplementary Table 4).

409

410 *How do genetic covariances and correlations change with environmental stress?*

411

412 There was no consistent trend detected for genetic covariances and no consistent pattern in  
413 genetic correlations (i.e., genetic covariances standardized by individual trait covariances)  
414 between species and thermal environments (Fig. 3; Supplementary Tables 5, 6). Genetic  
415 correlations in *D. birchii* were generally low ( $-0.32 < r_G < 0.46$ ), while *D. serrata* traits  
416 exhibited high positive and negative genetic correlations, but this was not consistent across  
417 environments (Fig. 3).

418 We did find highly negative and highly positive genetic correlations between  
419 fecundity and wing morphometries in *D. serrata* (including values of  $\pm 1.00$ ). However, these  
420 often had very wide standard errors and were not always significant. In the benign  
421 environment for *D. birchii*, we found a significant positive genetic correlation between wing  
422 size and a wing shape variable (RWb-2;  $r_G = 0.46 \pm 0.14$  SE;  $P < 0.01$ ). In the benign  
423 environment for *D. serrata*, we found a significant negative genetic correlation between  
424 fecundity and wing size ( $r_G = -1.00 \pm 0.08$  SE;  $P < 0.001$ ) and a significant positive (RWs-1;  
425  $r_G = 0.75 \pm 0.16$  SE;  $P < 0.0001$ ) and negative correlation between fecundity and a wing  
426 shape variable (RWs-4;  $r_G = -0.92 \pm 0.10$  SE;  $P = 0.0001$ ). In the stressful environment for *D.*  
427 *serrata*, we found a significant positive correlation between fecundity and wing size ( $r_G =$   
428  $0.84 \pm 0.29$  SE;  $P < 0.05$ ) and fecundity and a wing shape variable (RWs-4;  $r_G = 1.00 \pm 0.13$   
429 SE;  $P < 0.0001$ ; Fig. 3).

430

431 **Discussion**

432

433 The amount of genetic variation in a trait is important for predicting responses of populations  
434 and species to climate change as it determines the extent to which a trait can evolve via  
435 selection. However, genetic variance and heritability change between environments (Falconer  
436 and Mackay 1996; Hoffmann and Schiffer 1998; Hoffmann and Merilä 1999) potentially due  
437 to increased environmental variance and reduced additive genetic variance, genotype-by-  
438 environment interactions that affect cross-environment genetic correlations, and cryptic  
439 genetic variation (Fischer et al. 2020). It is essential to recognise and incorporate this  
440 consideration into climate change adaptation research (Shaw 2019), but consistent and  
441 predictable patterns have not been detected. It is unclear whether such patterns exist or  
442 whether genetic variance and heritability must always be considered in the context of specific  
443 traits, populations and environments. Here, we show that temperature stress can alter the  
444 heritability, coefficient of additive genetic variation, and evolvability, of both fecundity and  
445 morphological traits in two closely-related species of *Drosophila* (one being a generalist and  
446 one being a specialist). However, we found no consistent pattern in the direction of change in  
447 additive genetic variance and phenotypic and genetic covariances across thermal  
448 environments.

449 First, we confirmed that the warmer ('stressful') thermal environment did indeed  
450 induce stress in both species, as demonstrated by lower fecundity, smaller size, and a  
451 significantly different wing shape (Supplementary Tables 1–3 and Supplementary Figs. 2–4).  
452 In addition, the specialist species (*D. birchii*) failed to develop offspring within the stressful  
453 thermal environment. Although there were no experimental differences between the dam and  
454 daughter generation that might have caused this, it is possible that maternal effects induced  
455 by development within a stressful environment prevented the production of viable offspring.

456 This could alternatively be a paternal effect as it has been shown that *D. birchii* sperm is very  
457 sensitive to thermal stress during development (Saxon et al. 2018), and because we attempted  
458 to control for maternal effects by developing the initial parental generation (i.e., P in Fig. 1)  
459 in the same thermal environment as dams and daughters. Although not a direct aim of this  
460 paper, measuring the viability of offspring within a stressful environment is relevant to many  
461 evolutionary studies (both in the laboratory and in the field). This is because many studies  
462 estimate fitness by measuring the number of offspring directly, but the viability of those  
463 offspring are what will maintain the long-term fitness of a population.

464         Second, we found lower heritability in the stressful compared to the benign thermal  
465 environment for fecundity and wing size, although not in wing shape in *D. serrata* (Table 1;  
466 Fig. 2B). This corroborates a large number of previous studies that show heritability declined  
467 under stressful conditions (e.g., Hoffmann and Schiffer 1998; Kristensen et al. 2015; and  
468 reviewed in Hoffmann and Parsons 1991; Hoffmann and Merilä 1999; Charmantier and  
469 Garant 2005; Rowiński and Rogell 2017). This has important implications for species living  
470 close to their upper thermal limits (like many species in the tropics (Deutsch et al. 2008;  
471 Kingsolver et al. 2013) because even a small change in environmental conditions may induce  
472 a large amount of stress, and these results suggest adaptive potential is reduced under  
473 stressful temperatures.

474         However, heritability has been shown to have inherent issues when comparing  
475 between environments, as non-additive genetic and environmental variation contribute to it  
476 (Houle 1992). To address this problem, we also investigated the coefficient of additive  
477 genetic variation ( $CV_A$ ) and evolvability ( $I_A$ ). These are often more appropriate estimates to  
478 use when comparing genetic variation and evolvability across traits and environments, as  
479 they are not affected by non-additive sources of environmental variance (Houle 1992; Bublly  
480 and Loeschke 2002; Garcia-Gonzalez et al. 2012). Specifically, while heritability tells us the

481 expected absolute change in a trait mean under a given strength of selection from one  
482 generation to the next, evolvability predicts the relative change as a percentage of the trait  
483 mean (Hansen et al. 2003; Hansen et al. 2011; Garcia-Gonzalez et al. 2012).  $CV_A$  and  $I_A$  were  
484 higher under the stressful environment for fecundity, while the opposite was true for wing  
485 size (Fig. 2D). Therefore, while the heritability values suggest that the response to selection  
486 on fecundity and wing size will decrease under stressful temperatures,  $CV_A$  and  $I_A$  suggest  
487 that fecundity has greater relative evolutionary potential under the stressful environment than  
488 the benign environment and the opposite is true for wing size (Fig. 2). Although it seems  
489 heritability and  $CV_A$  values may be contradictory, it could be that while the absolute change  
490 in fitness (i.e., heritability) will be less in the stressful environment for fecundity, there will  
491 be a greater relative increase in fitness in the stressful environment because mean fitness is  
492 lower — but this could result in a smaller absolute change in trait mean thus corroborating  
493 the heritability results. However,  $CV_A$  and  $I_A$  values are still important metrics to consider  
494 because they will always change in the same direction as  $V_A$ . Alternatively, heritability does  
495 not necessarily change in the same direction as  $V_A$  because effects that increase  $V_A$  often  
496 increase total variance, which in turn will decrease heritability.

497 An increase in additive genetic variance under stressful temperatures for the measured  
498 fitness trait (i.e., fecundity) is advantageous for these *Drosophila* species, both of which live  
499 near critical thermal limits (Kellermann et al. 2009; Overgaard et al., 2011). Interestingly,  
500 these results are consistent with a recent meta-analysis (Rowiński and Rogell 2017), which  
501 showed that the coefficient of genetic variance ( $CV_A$ ) was higher under stressful conditions  
502 for life history traits but not for morphological traits. In terms of wing size, it should be noted  
503 that the measured  $CV_A$  differed from values previously measured in *D. birchii* (Kellermann et  
504 al. 2006), where  $CV_A$  was relatively two-fold higher than what we found here. However, in  
505 the previous experiment (Kellermann et al. 2006), wing size was measured from flies reared

506 in a benign environment at 25°C (compared to the benign environment measured in this study  
507 at 23°C), potentially indicating that even a slight difference in thermal environments can  
508 affect estimates of genetic variance. The reported  $V_A$  and  $V_P$  values indicate differences in  
509  $CV_A$  between this study and Kellermann et al. (2006) are due to an increased  $V_A$  in their study  
510 and not a difference in trait mean that could also induce larger  $CV_A$  values (if the trait mean  
511 was lower). Collectively, this, along with the other results discussed here, reveal that  
512 environmental interactions (that are included in estimating heritability but not  $CV_A$  and  $I_A$ ),  
513 potentially play a very large role in shaping the amount of additive genetic variance that  
514 selection can act upon.

515 Overall, our heritability values are similar to those reported for fecundity, wing size,  
516 and wing shape for *Drosophila* (Gilchrist and Partridge 1999; Hoffmann and Shirriffs 2002;  
517 Moraes et al. 2004; Kellermann et al. 2006). Additionally, we examined the differences in  
518 genetic variation between fecundity and morphological traits, since patterns in heritability  
519 and additive variance ( $CV_A$  and  $I_A$ ) were contradictory. We found that heritabilities were  
520 higher for the wing morphology traits than for fecundity (Fig. 2A, B). This coincides with the  
521 majority of literature that show morphological traits often have higher heritabilities than life  
522 history traits (Mousseau and Roff 1987; but for opposing example see Sgrò and Hoffmann  
523 1998c). In direct contrast to this,  $CV_A$  and  $I_A$  were both magnitudes larger for fecundity than  
524 what was found for wing morphology (Fig. 2C, D). This finding supports theory proposed by  
525 Houle (1992); that life history traits may have a higher evolvability than morphological traits.  
526 Under the benign environment,  $CV_A$  and  $I_A$  for fecundity were more than 94% higher than for  
527 wing size in both species, and in the stressful environment, fecundity exhibited a  $CV_A$  and  $I_A$   
528 that was approximately 80% higher than for wing size for *D. serrata* (Fig. 2).

529 The low heritability values detected for fecundity are consistent with classic theory  
530 that suggests ultimate fitness traits will exhibit low heritabilities due to directional selection

531 that fixes beneficial alleles and erodes additive and residual variance (Mousseau and Roff  
532 1987; Falconer and Mackay 1996; Merilä and Sheldon 1999). However, in direct contrast to  
533 this, we found that additive variance was actually significantly higher in fecundity where  $h^2$   
534 was low. When examining residual variance ( $V_{res} = V_P - V_A$ ), it becomes evident that  
535 increased residual variance is responsible for a reduced heritability in fecundity, rather than  
536 eroded additive genetic variance (Table 1; Kruuk et al. 2000; Merilä and Sheldon 2000;  
537 McCleery et al. 2004; Moraes et al. 2004). In a study examining how residual and additive  
538 variance contributes to heritability values across fitness and morphological traits, Merilä &  
539 Sheldon (2000) found fitness traits generally exhibit a higher residual variance compared to  
540 morphological traits due to an accumulation of non-additive genetic and early environmental  
541 effects. These results support their findings and emphasize the importance of considering trait  
542 type when examining how selection shapes additive genetic variance.

543 An additional aim of this study was to determine whether an easy-to-measure  
544 morphological trait can be used as a proxy for fecundity across environments. To examine  
545 this, we looked at phenotypic and genetic correlations between fecundity and wing  
546 morphology. Although it has been shown that wing length correlates with fecundity in benign  
547 environments (Chiang and Hodson 1950; Tantawy and Vetukhiv 1960; Santos et al. 1992;  
548 Woods et al. 2002), recent studies have found both evidence for (Woods et al. 2002) or a lack  
549 of evidence for (Sgrò and Hoffmann 1998a) positive relationships between wing length, wing  
550 width, and fecundity in stressful environments. Here, unadjusted significance tests are  
551 suggestive of significant phenotypic correlations between fecundity and wing size in the  
552 benign environment for one population of *D. birchii* dams and for *D. birchii* daughters; and  
553 in the stressful thermal environment for *D. serrata* daughters. However, these became  
554 insignificant after we corrected for False Discovery Rate (Table 2). Although this is a  
555 conservative method for multiple comparison in terms of type II errors, the results suggest we

556 cannot use wing size as a proxy for fecundity for these populations in these thermal  
557 environments (Fig. 3).

558 Genetic correlations were all fairly low in *D. birchii*, but highly-positive and highly-  
559 negative correlations were found in both environments for *D. serrata* (Fig. 3; Supplementary  
560 Table 6). Most interestingly in *D. serrata*, fecundity and wing size were significantly  
561 negatively-correlated in the benign environment and significantly positively-correlated in the  
562 stressful environment. A significant genetic correlation between a pair of traits suggests that  
563 the traits are genetically associated through linkage or pleiotropy (influenced by a common  
564 locus or loci; Wilson et al. 2010). However, a change in the magnitude or sign of genetic  
565 correlations across environments suggests that this genetic association is environment-  
566 specific (Falconer and Mackay 1996; see Gutteling et al. 2007 for example). So, while a  
567 positive correlation between fecundity and wing size in the stressful environment may  
568 indicate that the same gene underlies both traits or the genes influencing both traits are in  
569 linkage disequilibrium (Wood and Brodie 2016); a negative correlation in the benign  
570 environment may indicate antagonistic pleiotropy between them if this data was looked at  
571 independently. However, the drastic change between thermal environments suggests there are  
572 environment-specific gene effects that affect these correlations.

573 Additionally, when examining phenotypic correlations and genetic correlations  
574 together, we did not find phenotypic correlations that were similar to significant genetic  
575 correlations (Fig. 3). This suggests that the environment may be masking phenotypic  
576 correlations. The large standard errors associated with many of the genetic correlations also  
577 suggest that we may lack sufficient power to detect genetic correlations in some cases. Very  
578 large sample sizes are needed in quantitative genetic experiments to estimate heritabilities  
579 and genetic correlations with a high degree of precision (Roff 1995; Falconer and Mackay



580 1996). This is hard to achieve due to logistical challenges, and may partly explain why there  
581 is much variation across species, populations, and traits in the literature.

582

### 583 *Conclusion*

584

585 Here, we found that genetic variance and phenotypic and genetic correlations change across  
586 thermal environments. However, the direction of these changes was not always consistent  
587 across traits, closely-related species, populations within a species, or even generations. This  
588 suggests that researchers need to examine adaptive potential specific to their environment,  
589 species, and populations if they hope to obtain accurate parameters to predict evolutionary  
590 potential. The type of data collected here should represent a starting point for researchers  
591 aiming to do so.

592         Additionally, researchers need to be aware that high genetic variation does not  
593 necessarily indicate an increased evolutionary response. Although it is assumed that selection  
594 has a strong effect when genetic variation is high and a weak effect when genetic variation is  
595 low (when all other factors remain the same), there has been limited evidence showing how  
596 selection and genetic variance interact and the studies that have looked at their relationship  
597 report a fairly weak association (Wood and Brodie 2016; Ramakers et al. 2018). Future  
598 research needs to consider how evolutionary potential is affected by the environment. We  
599 show here that genetic variance is highly dependent on temperature and it is accepted that  
600 selection is directly mediated by the environment. Yet, specifically in terms of stressful  
601 temperatures, a meta-analysis on how selection and genetic variance are coupled found  
602 temperature is likely to affect the amount of genetic variation in a population more than the  
603 strength of selection (Wood and Brodie 2016). Wood and Brodie (2016) found that  
604 temperature affected the amount of genetic variation and the strength of selection in both

605 morphological and fitness traits asymmetrically; meaning the measured impact of  
606 temperature stress on genetic variation does not necessarily predict the magnitude of the  
607 evolutionary change. Researchers should examine how both genetic variance and selective  
608 force (both strength and directionality of selection) is influenced by specific environments to  
609 determine the adaptive potential of species to climate change. If a highly positive correlation  
610 exists between the two, environmental change would increase both, directly causing  
611 increased adaptation; and predictions on how species will adapt to changing environments  
612 would be more straightforward (Wood and Brodie 2016; Ramakers et al. 2018; Fischer et al.  
613 2020). Genetic correlations also need to be considered in this context. A negative genetic  
614 correlation between two traits will constrain evolution on one trait even with an increase in  
615 genetic variation and a positive selection differential (and vice versa; Conner 2012; Wood  
616 and Brodie 2016). An additional consideration is that the underlying genetic architecture of  
617 the trait (polygenic or large-effect loci) should be considered. For example, polygenic traits  
618 have been shown to produce greater long-term population viability than in traits affected by  
619 large-effect alleles when heritability and the selective force is constant (e.g., Kardos and  
620 Luikart 2021). Generally, life-history traits are thought to be polygenic in comparison to  
621 large-effect phenotypic traits related to morphology, indicating another reason why trait type  
622 needs to be considered when investigating adaptive potential.

623         In conclusion, although we present clear evidence that stressful temperatures affect  
624 genetic variation, we did not detect a consistent pattern to that change. These results suggest  
625 that adaptive potential cannot be generalized across environments, closely-related species or  
626 populations and needs to be considered on a case-by-case basis, specific to the trait in  
627 question, and by using a multivariate approach.

628

629 **Acknowledgements**

630

631 We would like to thank Malaika Chawla, Nicholas Bail, Naomi Laven, Natalie Swinhoe, and  
632 Paula Strickland for assistance in data collection, specifically for helping with the task of  
633 egg-counting. We thank Jodie Betts for technical assistance. This study was supported by  
634 grants from the American Society of Naturalists, the Ecological Society of Australia, the Wet  
635 Tropics Management Authority, James Cook University, and the American Australian  
636 Association to JC, as well as an Australian Research Council Discovery Grant  
637 (DE130100218) to MH.

638

639 **Conflict of Interest**

640

641 The authors declare there are no conflicts of interest.

642

643 **Data archiving**

644

645 Data will be archived in the Dryad data repository if paper is accepted for publication.

646

647 **References**

648

649 Adams D, Collyer M, Kaliontzopoulou A (2020) *geomorph: Geometric Morphometric*  
650 *Analyses of 2D/3D Landmark Data*. Version 3.3.1.

651

652 Adams DC, Rohlf FJ, Slice DE (2004) Geometric morphometrics: Ten years of progress  
653 following the ‘revolution’. *Ital J Zool* **71**: 5–16.

654

655 Agrawal AF, Stinchcombe JR (2009) How much do genetic covariances alter the rate of  
656 adaptation? *Proc R Soc B Biol Sci* **276**: 1183–1191.

657

658 Altman DG, Bland JM (2011) How to obtain the P value from a confidence interval. *BMJ*  
659 **343**: d2304.

660

661 Arnold SJ (1983) Morphology, Performance and Fitness. *Am Zool* **23**: 347–361.

662

663 Bellard C, Bertelsmeier C, Leadley P, Thuiller W, Courchamp F (2012) Impacts of climate  
664 change on the future of biodiversity. *Ecol Lett* **15**: 365–377.

665

666 Benjamini Y, Hochberg Y (1995) Controlling the False Discovery Rate: A Practical and  
667 Powerful Approach to Multiple Testing. *J R Stat Soc Ser B Methodol* **57**: 289–300.

668

669 Blows MW, Hoffmann AA (2005) A reassessment of genetic limits to evolutionary change.  
670 *Ecology* **86**: 1371–1384.

671

672 Bublik OA, Loeschcke V (2002) Effect of low stressful temperature on genetic variation of  
673 five quantitative traits in *Drosophila melanogaster*. *Heredity* **89**: 70–5.

674

675 Bublik OA, Loeschcke V, Imasheva AG (2001) Genetic variation of morphological traits in  
676 *Drosophila melanogaster* under poor nutrition: isofemale lines and offspring–parent  
677 regression. *Heredity* **86**: 363–369.

678

679 Carreira VP, Soto IM, Mensch J, Fanara JJ (2011) Genetic basis of wing morphogenesis in  
680 *Drosophila*: sexual dimorphism and non-allometric effects of shape variation. *BMC Dev Biol*  
681 **11**: 32.

682

683 Ceballos G, Ehrlich PR, Dirzo R (2017) Biological annihilation via the ongoing sixth mass  
684 extinction signaled by vertebrate population losses and declines. *Proc Natl Acad Sci* **114**:  
685 E6089–E6096.

686

687 Charmantier A, Garant D (2005) Environmental quality and evolutionary potential: lessons  
688 from wild populations. *Proc R Soc B Biol Sci* **272**: 1415–1425.

689

690 Cheverud JM (1988) A Comparison of Genetic and Phenotypic Correlations. *Evolution* **42**:  
691 958–968.

692

693 Chiang HC, Hodson AC (1950) An Analytical Study of Population Growth in *Drosophila*  
694 *melanogaster*. *Ecol Monogr* **20**: 173–206.

695

- 696 Conner JK (2012) Quantitative Genetic Approaches to Evolutionary Constraint: How Useful?  
697 *Evolution* **66**: 3313–3320.  
698
- 699 Conner J, Via S (1992) Patterns of phenotypic and genetic correlations among morphological  
700 and life-history traits in wild radish, *Raphanus raphanistrum*. *Evolution* **47**: 704–711.  
701
- 702 Czesak ME, Fox CW (2003) Evolutionary Ecology of Egg Size and Number in a Seed  
703 Beetle: Genetic Trade-Off Differs Between Environments. *Evolution* **57**: 1121–1132.  
704
- 705 Deutsch CA, Tewksbury JJ, Huey RB, Sheldon KS, Ghalambor CK, Haak DC, *et al.* (2008)  
706 Impacts of climate warming on terrestrial ectotherms across latitude. *Proc Natl Acad Sci* **105**:  
707 6668–6672.  
708
- 709 Falconer DS, Mackay TFC (1996) *Introduction to Quantitative Genetics*, 4th edn. John  
710 Wiley & Sons, Inc. New York, NY.  
711
- 712 Fischer K, Kreyling J, Beaulieu M, Beil I, Bog M, Bonte D, *et al.* (2020) Species-specific  
713 effects of thermal stress on the expression of genetic variation across a diverse group of plant  
714 and animal taxa under experimental conditions. *Heredity*: 1–15.  
715
- 716 Fisher RA (1930) *The genetical theory of natural selection*. Clarendon Press: Oxford,  
717 England.  
718

719 Funk WC, Forester BR, Converse SJ, Darst C, Morey S (2019) Improving conservation  
720 policy with genomics: a guide to integrating adaptive potential into U.S. Endangered Species  
721 Act decisions for conservation practitioners and geneticists. *Conserv Genet* **20**: 115–134.  
722

723 Garcia-Gonzalez F, Simmons LW, Tomkins JL, Kotiaho JS, Evans JP (2012) Comparing  
724 Evolvabilities: Common Errors Surrounding the Calculation and Use of Coefficients of  
725 Additive Genetic Variation. *Evolution* **66**: 2341–2349.  
726

727 Gilchrist AS, Partridge L (1999) A Comparison of the Genetic Basis of Wing Size  
728 Divergence in Three Parallel Body Size Clines of *Drosophila melanogaster*. *Genetics* **153**:  
729 1775–1787.  
730

731 Gilchrist AS, Partridge L (2001) The contrasting genetic architecture of wing size and shape  
732 in *Drosophila melanogaster*. *Heredity* **86**: 144–152.  
733

734 Gómez JM, Abdelaziz M, Muñoz-Pajares J, Perfectti F (2009) Heritability and Genetic  
735 Correlation of Corolla Shape and Size in *Erysimum Mediohispanicum*. *Evolution* **63**: 1820–  
736 1831.  
737

738 Goodall C (1991) Procrustes Methods in the Statistical Analysis of Shape. *J R Stat Soc Ser B*  
739 *Methodol* **53**: 285–339.  
740

741 Guerra D, Pezzoli MC, Giorgi G, Garoia F, Cavicchi S (1997) Developmental constraints in  
742 the *Drosophila* wing. *Heredity* **79**: 564–571.  
743

- 744 Gutteling EW, Doroszuk A, Riksen J a. G, Prokop Z, Reszka J, Kammenga JE (2007)  
745 Environmental influence on the genetic correlations between life-history traits in  
746 *Caenorhabditis elegans*. *Heredity* **98**: 206–213.  
747
- 748 Hansen TF, Armbruster WS, Carlson ML, Pélabon C (2003) Evolvability and genetic  
749 constraint in *Dalechampia* blossoms: Genetic correlations and conditional evolvability. *Mol*  
750 *Dev Evol* **296B**: 23–39.  
751
- 752 Hansen TF, Pélabon C, Houle D (2011) Heritability is not Evolvability. *Evol Biol* **38**: 258–  
753 277.  
754
- 755 Hausmann NJ, Juenger TE, Sen S, Stowe KA, Dawson TE, Simms EL (2005) Quantitative  
756 trait loci affecting delta13C and response to differential water availability in *Arabidopsis*  
757 *thaliana*. *Evol Int J Org Evol* **59**: 81–96.  
758
- 759 Higie M, Blows MW (2008) The Evolution of Reproductive Character Displacement  
760 Conflicts with How Sexual Selection Operates Within a Species. *Evolution* **62**: 1192–1203.  
761
- 762 Hoffmann AA, Merilä J (1999) Heritable variation and evolution under favourable and  
763 unfavourable conditions. *Trends Ecol Evol* **14**: 96–101.  
764
- 765 Hoffmann AA, Parsons PA (1991) *Evolutionary genetics and environmental stress*. Oxford  
766 University Press.  
767



768 Hoffmann AA, Schiffer M (1998) Changes in the Heritability of Five Morphological Traits  
769 Under Combined Environmental Stresses in *Drosophila melanogaster*. *Evolution* **52**: 1207–  
770 1212.  
771  
772 Hoffmann AA, Sgrò CM (2011) Climate change and evolutionary adaptation. *Nature* **470**:  
773 479–485.  
774  
775 Hoffmann AA, Shirriffs J (2002) Geographic Variation for Wing Shape in *Drosophila*  
776 *Serrata*. *Evolution* **56**: 1068–1073.  
777  
778 Holman L, Jacomb F (2017) The effects of stress and sex on selection, genetic covariance,  
779 and the evolutionary response. *J Evol Biol* **30**: 1898–1909.  
780  
781 Houle D (1992) Comparing Evolvability and Variability of Quantitative Traits. *Genetics* **130**:  
782 195–204.  
783  
784 Kardos M, Luikart G (2021) The genetic architecture of fitness drives population viability  
785 during rapid environmental change. *Am Nat*: 37.  
786  
787 Kellermann VM, van Heerwaarden B, Hoffmann AA, Sgró CM (2006) Very low additive  
788 genetic variance and evolutionary potential in multiple populations of two rainforest  
789 *Drosophila* species. *Evolution* **60**: 1104–1108.  
790

791 Kellermann VM, van Heerwaarden B, Sgró CM, Hoffmann AA (2009) Fundamental  
792 Evolutionary Limits in Ecological Traits Drive *Drosophila* Species Distributions. *Science*  
793 **325**: 1244–1246.  
794  
795 Kingsolver JG, Diamond SE, Buckley LB (2013) Heat stress and the fitness consequences of  
796 climate change for terrestrial ectotherms. *Funct Ecol* **27**: 1415–1423.  
797  
798 Kristensen TN, Overgaard J, Lassen J, Hoffmann AA, Sgrò C (2015) Low evolutionary  
799 potential for egg-to-adult viability in *Drosophila melanogaster* at high temperatures.  
800 *Evolution* **69**: 803–814.  
801  
802 Kruuk LEB, Clutton-Brock TH, Slate J, Pemberton JM, Brotherstone S, Guinness FE (2000)  
803 Heritability of fitness in a wild mammal population. *Proc Natl Acad Sci* **97**: 698–703.  
804  
805 McCleery R, Pettifor R, Armbruster P, Meyer K, Sheldon B, Perrins C (2004) Components  
806 of Variance Underlying Fitness in a Natural Population of the Great Tit *Parus major*. *Am Nat*  
807 **164**: E62-72.  
808  
809 Merilä J, Sheldon BC (1999) Genetic architecture of fitness and nonfitness traits: empirical  
810 patterns and development of ideas. *Heredity* **83**: 103–109.  
811  
812 Merilä J, Sheldon B (2000) Lifetime reproductive success and heritability in nature. *Am Nat*  
813 **155**: 301–310.  
814

- 815 Monteiro LR, Diniz-Filho JAF, Reis SF dos, Araújo ED (2002) Geometric estimates of  
816 heritability in biological shape. *Evolution* **56**: 563–572.
- 817
- 818 Moraes EM, Manfrin MH, Laus AC, Rosada RS, Bomfin SC, Sene FM (2004) Wing shape  
819 heritability and morphological divergence of the sibling species *Drosophila mercatorum* and  
820 *Drosophila paranaensis*. *Heredity* **92**: 466–473.
- 821
- 822 Mousseau T, Roff D (1987) Natural selection and the heritability of fitness components.  
823 *Heredity* **59**: 181–97.
- 824
- 825 Nguyen TTX, Moehring AJ (2015) Accurate Alternative Measurements for Female Lifetime  
826 Reproductive Success in *Drosophila melanogaster*. *PLoS ONE* **10**.
- 827
- 828 Orr HA (2009) Fitness and its role in evolutionary genetics. *Nat Rev Genet* **10**: 531–539.
- 829
- 830 Overgaard J, Kristensen TN, Mitchell KA, Hoffmann AA (2011) Thermal Tolerance in  
831 Widespread and Tropical *Drosophila* Species: Does Phenotypic Plasticity Increase with  
832 Latitude? *Am Nat* **178**: S80–S96.
- 833
- 834 Pekkala N, Kotiaho JS, Puurtinen M (2011) Laboratory Relationships between Adult  
835 Lifetime Reproductive Success and Fitness Surrogates in a *Drosophila littoralis* Population.  
836 *PLoS ONE* **6**: e24560.
- 837
- 838 *R Core Team* (2019) R: A language and environment for statistical computing. R Foundation  
839 for Statistical Computing, Vienna, Austria. URL <https://www.R-project.org/>

840

841 Ramakers JJC, Culina A, Visser ME, Gienapp P (2018) Environmental coupling of  
842 heritability and selection is rare and of minor evolutionary significance in wild populations.  
843 *Nat Ecol Evol* **2**: 1093–1103.

844

845 Reeve ECR (1955) The Variance of the Genetic Correlation Coefficient. *Biometrics* **11**: 357–  
846 374.

847

848 Robertson FW (1956) Studies in quantitative inheritance XI. Genetic and environmental  
849 correlation between body size and egg production in *Drosophila melanogaster*. *J Genet* **83**:  
850 17–32.

851

852 Robertson A (1959) The Sampling Variance of the Genetic Correlation Coefficient.  
853 *Biometrics* **15**: 469–485.

854

855 Roff DA (1995) The estimation of genetic correlations from phenotypic correlations: a test of  
856 Cheverud's conjecture. *Heredity* **74**: 481–490.

857

858 Rohlf FJ (2000) On the use of shape spaces to compare morphometric methods. *Hystrix* **11**:  
859 17.

860

861 Rohlf FJ (2003) Bias and error in estimates of mean shape in geometric morphometrics. *J*  
862 *Hum Evol* **44**: 665–683.

863

864 Rohlf FJ (2010a) *tpsUtil*. Version 1.44. Stony Brook University, NY.

865

866 Rohlf FJ (2010b) *tpsRelw*. Version 1.49. Stony Brook University, NY.

867

868 Rohlf FJ (2016) *tpsDig*. Version 2.2. Stony Brook University, NY.

869

870 Rohlf FJ, Slice D (1990) Extensions of the Procrustes method for the optimal

871 superimposition of landmarks. *Syst Biol* **39**: 40–59.

872

873 Rosenberg A (1982) On the Propensity Definition of Fitness. *Philos Sci* **49**: 268–273.

874

875 Rowiński PK, Rogell B (2017) Environmental stress correlates with increases in both genetic  
876 and residual variances: A meta-analysis of animal studies. *Evolution* **71**: 1339–1351.

877

878 Santos M, Ruiz A, Quezada-Díaz JE, Barbadilla A, Fontdevila A (1992) The evolutionary  
879 history of *Drosophila buzzatii*. XX. Positive phenotypic covariance between field adult  
880 fitness components and body size. *J Evol Biol* **5**: 403–422.

881

882 Saxon AD, O’Brien EK, Bridle JR (2018) Temperature fluctuations during development  
883 reduce male fitness and may limit adaptive potential in tropical rainforest *Drosophila*. *J Evol*  
884 *Biol* **31**: 405–415.

885

886 Schiffer M, Mcevey SF (2006) *Drosophila bunnanda*-a new species from northern Australia  
887 with notes on other Australian members of the montium subgroup (Diptera: Drosophilidae).

888 *Zootaxa* **1333**: 1.

889

- 890 Sgrò CM, Hoffmann AA (1998a) Effects of temperature extremes on genetic variances for  
891 life history traits in *Drosophila melanogaster* as determined from parent-offspring  
892 comparisons. *J Evol Biol* **11**: 1–20.  
893
- 894 Sgrò CM, Hoffmann AA (1998b) Heritable Variation for Fecundity in Field-Collected  
895 *Drosophila Melanogaster* and Their Offspring Reared Under Different Environmental  
896 Temperatures. *Evolution* **52**: 134–143.  
897
- 898 Sgrò CM, Hoffmann AA (1998c) Effects of stress combinations on the expression of additive  
899 genetic variation for fecundity in *Drosophila melanogaster*. *Genet Res* **72**: 13–18.  
900
- 901 Sgrò CM, Hoffmann AA (2004) Genetic correlations, tradeoffs and environmental variation.  
902 *Heredity* **93**: 241–248.  
903
- 904 Shaw RG (2019) From the Past to the Future: Considering the Value and Limits of  
905 Evolutionary Prediction. *Am Nat* **193**: 1–10.  
906
- 907 Swindell WR, Bouzat JL (2006) Associations between environmental stress, selection  
908 history, and quantitative genetic variation in *Drosophila melanogaster*. *Genetica* **127**: 311–  
909 320.  
910
- 911 Tantawy AO, Vetukhiv MO (1960) Effects of Size on Fecundity, Longevity and Viability in  
912 Populations of *Drosophila pseudoobscura*. *Am Nat* **94**: 395–403.  
913

- 914 Thomas CD, Cameron A, Green RE, Bakkenes M, Beaumont LJ, Collingham YC, *et al.*  
915 (2004) Extinction risk from climate change. *Nature* **427**: 145–148.  
916
- 917 Urban MC, Bocedi G, Hendry AP, Mihoub JB, Pe'er G, Singer A, *et al.* (2016) Improving  
918 the forecast for biodiversity under climate change. *Science* **353**.  
919
- 920 Walsh B, Blows MW (2009) Abundant Genetic Variation + Strong Selection = Multivariate  
921 Genetic Constraints: A Geometric View of Adaptation. *Annu Rev Ecol Evol Syst* **40**: 41–59.  
922
- 923 Wilson AJ, Réale D, Clements MN, Morrissey MM, Postma E, Walling CA, *et al.* (2010) An  
924 ecologist's guide to the animal model. *J Anim Ecol* **79**: 13–26.  
925
- 926 Wood CW, Brodie ED (2015) Environmental effects on the structure of the G-matrix.  
927 *Evolution* **69**: 2927–2940.  
928
- 929 Wood CW, Brodie ED (2016) Evolutionary response when selection and genetic variation  
930 covary across environments. *Ecol Lett* **19**: 1189–1200.  
931
- 932 Woods RE, Sgrò CM, Hercus MJ, Hoffmann AA (2002) Fluctuating asymmetry, fecundity  
933 and development time in *Drosophila*: is there an association under optimal and stress  
934 conditions? *J Evol Biol* **15**: 146–157.  
935
- 936 Zelditch M, Swiderski D, Sheets HD, Fink W (2004) *Geometric Morphometrics for*  
937 *Biologists: A Primer*. Academic Press: San Diego.  
938

939 Zuur AF, Ieno EN, Elphick CS (2010) A protocol for data exploration to avoid common  
940 statistical problems. *Methods Ecol Evol* **1**: 3–14.  
941



942 **Figure legends**

943

944 **Figure 1: Parent-offspring quantitative genetic experimental design.**

945 The parent-offspring quantitative genetic experimental design used to measure female  
946 fecundity, wing size, and wing shape on both dams and daughters. This design was used for  
947 two populations of both *D. birchii* and *D. serrata*. Experimental female flies were raised in  
948 either a non-stressful rearing temperature (23°C) or a stressful temperature (28°C). Mass bred  
949 populations were raised alongside each generation and supplied males for mating purposes.

950

951 **Figure 2: Heritability ( $h^2$ ) and coefficient of additive variance ( $CV_A$ ) values for a life**  
952 **history trait and morphological traits across a benign (23°C) and stressful (28°C)**  
953 **thermal environment.**

954 Two standardized estimates of additive genetic variance are shown for a life history and two  
955 morphological traits in two closely-related species of *Drosophila*. (A, B) Heritability is  
956 standardized by the total genetic variance and (C, D) coefficient of additive genetic variance  
957 is standardized by the trait mean. Evolvability (not shown) will exhibit the same pattern as  
958  $CV_A$ . Standard errors (2x) are shown as error-bars, and asterisks indicate significance of the  
959 estimate after correction (.  $P < 0.1$ ; \*  $P < 0.05$ ; \*\*\*  $P < 0.001$ ; \*\*\*\*  $P < 0.0001$ ). Standard  
960 errors for  $CV_A$  were calculated using the standard error estimates from heritability (see  
961 Supplementary Tables 1, 2 for details).

962

963 **Figure 3. Genetic and phenotypic correlations for fecundity and wing morphology in**  
964 **two sibling-species of *Drosophila*.**

965 Genetic correlations ( $r_G$ ) and phenotypic correlations ( $r_P$ ) between the trait on the x-axis  
966 (fecundity and wing size) and the trait on the y-axis (wing size and wing shape RW scores)

967 across a benign and stressful thermal environment in **(A)** *D. birchii* and **(B)** *D. serrata*.  
968 Standard errors (2x) for the correlations are indicated by the grey error bars. Asterisks (in  
969 red) denote the correlation is significantly different from 0, obtained from the  $z$ -statistic  
970 calculated from standard errors (Altman and Bland, 2011) and  $P$ -values have been adjusted  
971 by the False Discovery Rate method (Benjamini and Hochberg 1995) (\*  $P < 0.05$ ; \*\*\*  $P <$   
972  $0.001$ ; \*\*\*\*  $P < 0.0001$ ). Phenotypic correlations shown are for the dam generation.

**Figure 1**

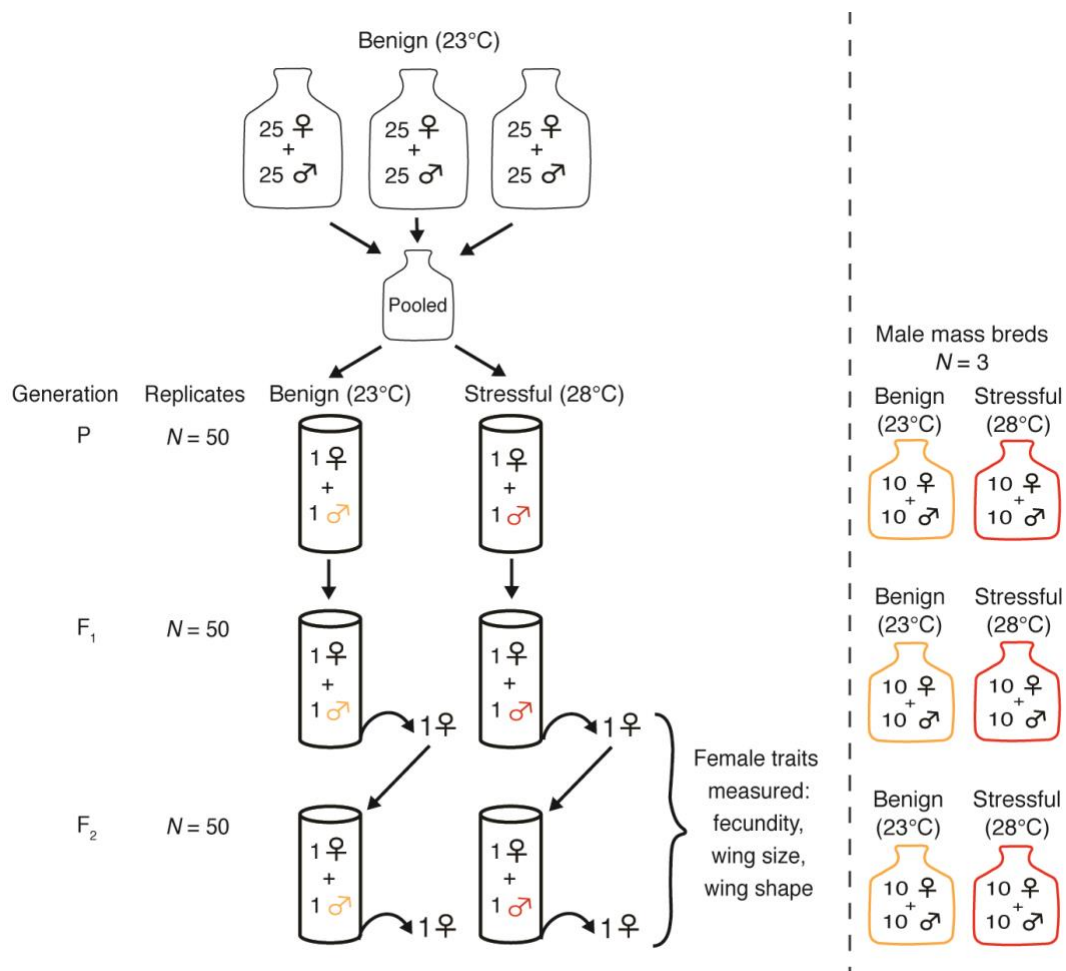

**Figure 2**

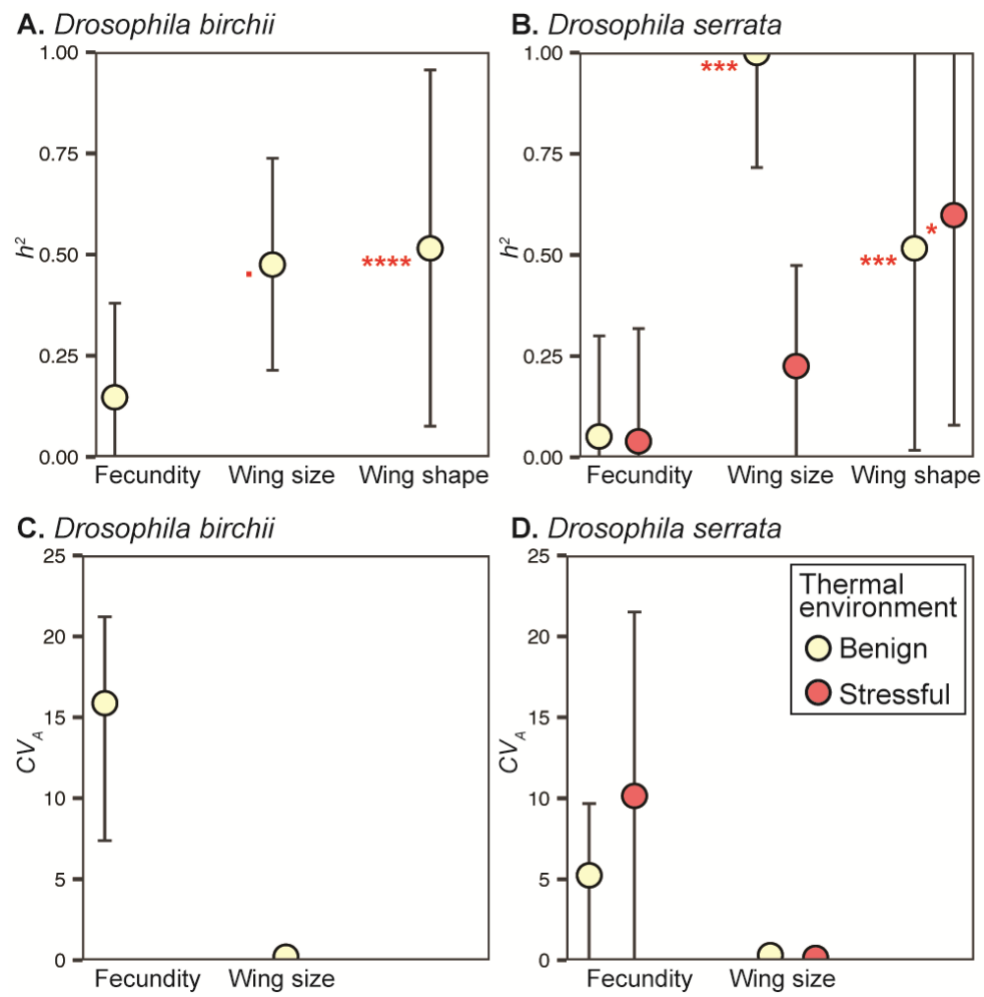



**Table 1. Expression of genetic variance parameters for fecundity, wing size, and wing shape;** including heritability ( $h^2$ ), the coefficient of additive variance ( $CV_A$ ), and evolvability ( $I_A$ ). Phenotypic ( $V_P$ ), additive ( $V_A$ ) and residual ( $V_{res}$ ) variances are also shown for the pooled dam and daughter values. Population was not a significant contributor to variance, so one metric was calculated per species from parent-offspring regressions. Bold values indicate a slope significantly different than zero and asterisks indicate significance level after correction for False Discovery Rate ( $. P < 0.1$ ;  $* P < 0.05$ ;  $*** P < 0.001$ ;  $**** P < 0.0001$ ). Parameters could not be calculated for *D. birchii* within the stressful environment because daughters did not develop.  $CV_A$  and  $I_A$  values shown are  $\times 10^2$ . Values for individual relative warp scores for wing shape can be found in Supplementary Table 3.

| Trait             | Species           | Benign (23°C) |                             |        |        |           |        |        | Stressful (28 °C) |                          |        |        |           |        |        |
|-------------------|-------------------|---------------|-----------------------------|--------|--------|-----------|--------|--------|-------------------|--------------------------|--------|--------|-----------|--------|--------|
|                   |                   | <i>N</i>      | $h^2 \pm SE$                | $V_P$  | $V_A$  | $V_{res}$ | $CV_A$ | $I_A$  | <i>N</i>          | $h^2 \pm SE$             | $V_P$  | $V_A$  | $V_{res}$ | $CV_A$ | $I_A$  |
| <u>Fecundity</u>  | <i>D. birchii</i> | 86            | 0.148 $\pm$ 0.116           | 1384.6 | 204.92 | 1179.68   | 15.88  | 2.524  | -                 | -                        | -      | -      | -         | -      | -      |
|                   | <i>D. serrata</i> | 69            | 0.052 $\pm$ 0.124           | 1105.1 | 57.47  | 1047.64   | 5.26   | 0.276  | 65                | 0.040 $\pm$ 0.139        | 1879.5 | 75.18  | 1804.32   | 10.17  | 1.032  |
| <u>Wing size</u>  | <i>D. birchii</i> | 81            | <b>0.476</b> $\pm$ 0.131.   | 0.0005 | 0.0002 | 0.0003    | 0.224  | 0.0005 | -                 | -                        | -      | -      | -         | -      | -      |
|                   | <i>D. serrata</i> | 64            | <b>1.000</b> $\pm$ 0.142*** | 0.0005 | 0.0005 | 0.0000    | 0.324  | 0.0011 | 62                | 0.226 $\pm$ 0.124        | 0.0005 | 0.0001 | 0.0004    | 0.156  | 0.0002 |
| <u>Wing shape</u> | <i>D. birchii</i> | 81            | <b>0.516</b> $\pm$ 0.22**** | -      | -      | -         | -      | -      | -                 | -                        | -      | -      | -         | -      | -      |
|                   | <i>D. serrata</i> | 64            | <b>0.517</b> $\pm$ 0.25***  | -      | -      | -         | -      | -      | 62                | <b>0.599</b> $\pm$ 0.26* | -      | -      | -         | -      | -      |

**Table 2: Phenotypic correlations between fecundity and wing size.**  $r_P$  is the phenotypic correlation and the  $P$ -values were obtained from an  $F$ -test of the linear regression of one trait on the other and both unadjusted (raw) and adjusted (corrected for using the False Discovery Rate method (Benjamini and Hochberg 1995) are shown. Sample sizes ( $N$ ) indicate the number of individuals used in each correlation. Phenotypic correlations were calculated for each population separately when population was found to be a significant contributor to variation.

| Species                  | Generation Population | Benign (23°C) |       |                  |            | Stressful (28 °C) |       |                  |            |
|--------------------------|-----------------------|---------------|-------|------------------|------------|-------------------|-------|------------------|------------|
|                          |                       | $N$           | $r_P$ | $P$ -value (raw) | $P$ -value | $N$               | $r_P$ | $P$ -value (raw) | $P$ -value |
| <u><i>D. birchii</i></u> | Dams                  | 86            | 0.30  | 0.168            | 0.437      | 78                | 0.22  | 0.346            | 0.647      |
|                          | Mt. Lewis             | 45            | -0.14 | 0.655            | 0.763      | -                 | -     | -                | -          |
|                          | Paluma                | 41            | 0.76  | 0.014*           | 0.104      | -                 | -     | -                | -          |
|                          | Daughters             | 87            | 0.58  | 0.007**          | 0.073      | -                 | -     | -                | -          |
| <u><i>D. serrata</i></u> | Dams                  | 78            | -0.14 | 0.526            | 0.760      | 77                | -0.18 | 0.422            | 0.707      |
|                          | Daughters             | 67            | 0.12  | 0.628            | 0.763      | 65                | 0.52  | 0.035*           | 0.202      |
